# Supplementary material for: Hospitalization Duration for Acute Myocardial Infarction: A Temporal Analysis of 18-Year United States Data
Source: MDPI journal article supplement (doi:10.3390/medicina58121846), 2022-12-15
Supplement: s1 [file s1]

## SUPPLEMENTARY TABLES

**Supplementary Table S1. Administrative codes used for identification of diagnoses and procedures**

| <b>Comorbidity</b>                   | <b>International Classification of Diseases 9.0 Clinical Modification codes</b>                                     |
|--------------------------------------|---------------------------------------------------------------------------------------------------------------------|
| Cardiac arrest                       | 427.5, 427.41, 99.60, 99.63                                                                                         |
| Ventricular tachycardia/fibrillation | 427.4, 427.41, 427.42, 427.1                                                                                        |
| Coronary angiography                 | 37.22, 37.23, 88.53-88.56                                                                                           |
| Percutaneous coronary intervention   | 00.66, 36.01, 36.02, 36.05, 36.06, 36.07, 88.57                                                                     |
| Invasive hemodynamic assessment      | 89.63, 89.64, 89.66, 89.67, 89.68                                                                                   |
| Mechanical circulatory support       | 37.61, 37.68, 39.65                                                                                                 |
| Invasive mechanical ventilation      | 96.7, 96.70, 96.71, 96.72                                                                                           |
| Hemodialysis                         | 39.95                                                                                                               |
| Hepatic failure                      | 570.0, 572.2, 573.3, 573.4                                                                                          |
| Respiratory failure                  | 518.81, 518.82, 518.85, 786.09, 799.1, 96.7, 96.70, 96.71, 96.72                                                    |
| Renal failure                        | 584, 584.5, 584.6, 584.7, 584.8, 584.9                                                                              |
| Hematologic failure                  | 286.6-286.9, 287.4, 287.5                                                                                           |
| Neurological failure                 | 293, 293.0, 293.1, 293.8, 293.81-293.84, 293.89, 293.9, 348.1, 348.3, 348.30, 348.81, 348.39, 780.01, 780.09, 89.14 |

**Supplementary Table S2: Multivariable regression for in-hospital mortality in for LOS in AMI**

| Total cohort<br><br>(N=11,622,528)                     |                                     | Odds<br><br>ratio  | 95% confidence interval |             | P      |
|--------------------------------------------------------|-------------------------------------|--------------------|-------------------------|-------------|--------|
|                                                        |                                     |                    | Lower Limit             | Upper Limit |        |
| LOS ≤ 3 days                                           |                                     | Reference category |                         |             |        |
| LOS > 3 days                                           |                                     | 3.00               | 2.98                    | 3.02        | <0.001 |
| Age (years)                                            | <75 years                           | Reference category |                         |             |        |
|                                                        | >75 years                           | 0.48               | 0.47                    | 0.48        | <0.001 |
| Female sex                                             |                                     | 0.86               | 0.85                    | 0.86        | <0.001 |
| Race                                                   | White                               | Reference category |                         |             |        |
|                                                        | Black                               | 0.95               | 0.95                    | 0.96        | <0.001 |
|                                                        | Others <sup>a</sup>                 | 0.84               | 0.83                    | 0.85        | <0.001 |
| Primary payer                                          | Medicare                            | Reference category |                         |             |        |
|                                                        | Medicaid                            | 1.07               | 1.05                    | 1.08        | <0.001 |
|                                                        | Private                             | 0.90               | 0.88                    | 0.92        | <0.001 |
|                                                        | Others <sup>b</sup>                 | 0.70               | 0.69                    | 0.72        | <0.001 |
| Year                                                   | 2000-2005                           | Reference Category |                         |             |        |
|                                                        | 2006-2011                           | 2.10               | 2.08                    | 2.12        | <0.001 |
|                                                        | 2012-2014                           | 1.33               | 1.32                    | 1.34        | <0.001 |
| Quartile of median<br>household<br>income for zip code | 0-25 <sup>th</sup>                  | Reference category |                         |             |        |
|                                                        | 26 <sup>th</sup> -50 <sup>th</sup>  | 1.11               | 1.10                    | 1.12        | <0.001 |
|                                                        | 51 <sup>st</sup> -75 <sup>th</sup>  | 1.08               | 1.07                    | 1.09        | <0.001 |
|                                                        | 75 <sup>th</sup> -100 <sup>th</sup> | 1.02               | 1.02                    | 1.03        | <0.001 |
| Hospital teaching<br>status and location               | Rural                               | Reference category |                         |             |        |
|                                                        | Urban Non-Teaching                  | 0.79               | 0.78                    | 0.79        | <0.001 |

|                                            |                                 |                    |      |      |        |
|--------------------------------------------|---------------------------------|--------------------|------|------|--------|
|                                            | <b>Urban Teaching</b>           | 0.85               | 0.85 | 0.86 | <0.001 |
| <b>Hospital bed-size</b>                   | <b>Small</b>                    | Reference category |      |      |        |
|                                            | <b>Medium</b>                   | 1.04               | 1.01 | 1.07 | <0.001 |
|                                            | <b>Large</b>                    | 1.08               | 1.05 | 1.11 | <0.001 |
| <b>Hospital region</b>                     | <b>Northeast</b>                | Reference category |      |      |        |
|                                            | <b>Midwest</b>                  | 1.26               | 1.25 | 1.28 | <0.001 |
|                                            | <b>South</b>                    | 1.18               | 1.17 | 1.19 | <0.001 |
|                                            | <b>West</b>                     | 1.29               | 1.28 | 1.30 | <0.001 |
| <b>Charlson<br/>Comorbidity Index</b>      | <b>0-3</b>                      | Reference category |      |      |        |
|                                            | <b>4-6</b>                      | 0.31               | 0.31 | 0.32 | <0.001 |
|                                            | <b>≥ 7</b>                      | 0.70               | 0.69 | 0.71 | <0.001 |
| <b>Type of AMI</b>                         | <b>ST-segment elevation</b>     | Reference category |      |      |        |
|                                            | <b>Non-ST-segment elevation</b> | 2.02               | 2.02 | 2.03 | <0.001 |
| <b>Multi-organ failure</b>                 |                                 | 0.22               | 0.22 | 0.23 | <0.001 |
| <b>Cardiac arrest</b>                      |                                 | 0.10               | 0.10 | 0.17 | <0.001 |
| <b>Cardiogenic shock</b>                   |                                 | 0.39               | 0.38 | 0.39 | <0.001 |
| <b>Atrial fibrillation</b>                 |                                 | 0.78               | 0.78 | 0.79 | <0.001 |
| <b>Atrial flutter</b>                      |                                 | 1.13               | 1.11 | 1.15 | <0.001 |
| <b>Coronary angiography</b>                |                                 | 2.52               | 2.50 | 2.55 | <0.001 |
| <b>Percutaneous coronary intervention</b>  |                                 | 2.28               | 2.26 | 2.31 | <0.001 |
| <b>Coronary artery bypass grafting</b>     |                                 | 1.42               | 1.40 | 1.44 | <0.001 |
| <b>Pulmonary artery catheterization</b>    |                                 | 0.73               | 0.72 | 0.75 | <0.001 |
| <b>Mechanical circulatory support</b>      |                                 | 0.44               | 0.44 | 0.45 | <0.001 |
| <b>Non-invasive mechanical ventilation</b> |                                 | 0.63               | 0.62 | 0.64 | <0.001 |
| <b>Invasive mechanical ventilation</b>     |                                 | 0.28               | 0.28 | 0.29 | <0.001 |

|                           |      |      |      |        |
|---------------------------|------|------|------|--------|
| <b>Acute hemodialysis</b> | 0.47 | 0.46 | 0.48 | <0.001 |
|---------------------------|------|------|------|--------|

**Legend:** <sup>a</sup>Hispanic, Asian or Pacific Islander, Native American, Others; <sup>b</sup>Self-Pay, No Charge, Others

**Abbreviations:** AMI: acute myocardial infarction, LOS: length of stay
